# Supplementary material for: A luminescent metal–organic framework with tetragonal nanochannels as an efficient chemosensor for nitroaromatic explosives detection
Source: Royal Society of Chemistry journal article supplement (doi:10.1039/d1ce00331c), 2021-01-01
Supplement: d1ce00331c1.pdf [file d1ce00331c1.pdf]

## Supporting Information

### **A luminescent metal-organic framework with tetragonal nanochannel as efficient chemosensor for nitroaromatic explosives detection**

**Wei Xie,<sup>a</sup> Wei Jiang,<sup>a</sup> Guang-Juan Xu,<sup>a</sup> Shu-Ran Zhang,<sup>a</sup> Yan-Hong  
Xu,<sup>\*a</sup> and Zhong-Min Su<sup>\*b</sup>**

<sup>a</sup> Key Laboratory of Preparation and Application of Environmental Friendly Materials  
(Jilin Normal University), Ministry of Education, Changchun, 130103, China.

E-mail: xuyh198@163.com

<sup>b</sup> Institute of Functional Material Chemistry, Faculty of Chemistry, Northeast Normal  
University, Changchun 130024, Jilin (P. R. China).

E-mail: zmsu@nenu.edu.cn

## S1. Materials and measurements

All chemical reagents for synthesis were purchased commercially and were used directly without further purification. Powder X-ray diffraction (PXRD) patterns were performed on a Rigaku model RINT Ultima III diffractometer in the range of 3 - 50° with 0.02° increment at room temperature. The fourier transformed infrared spectroscopy (FT-IR) spectra were recorded in the range 4000-400 cm<sup>-1</sup> on a Perkin-elmer model FT-IR-frontier infrared spectrometer using KBr pellets. Thermogravimetric analysis (TGA) was performed using a Q5000IR analyser (TA Instruments) with an automated vertical overhead thermobalance heated from room temperature to 700 °C at a ramp rate of 5 °C/min under nitrogen gas atmosphere. Elemental analyses (C, H and N) were conducted on a Perkin-Elmer 2400CHN elemental analyzer. The solid UV-visible analyzer was performed using Jasco UV-770. The fluorescence spectra were carried out using Jasco FP-8600 spectrometer (JAPAN) spectrofluorometer.

## S2. Synthesis of MOF 1

Zn(NO<sub>3</sub>)<sub>2</sub>·6H<sub>2</sub>O (0.06 g, 0.2 mmol) and 4,4',4''-nitrotribenzoic acid (H<sub>3</sub>TPA, 0.0151 g, 0.040 mmol) were dissolved in 6 mL DMA (N, N-dimethylacetamide), and then the final mixture was placed into a Teflon-lined stainless steel vessel (15 mL) under autogenous pressure and heated at 100 °C for 3 days, and thereafter was slowly cooled to room temperature. Light yellow block crystals were obtained, which were washed with mother liquid, in about 62 % yield based on H<sub>3</sub>TPA. Elemental microanalysis for C<sub>74</sub>H<sub>100</sub>N<sub>10</sub>O<sub>23</sub>Zn<sub>4</sub>, calculated (%): C, 50.53; H, 5.73; N, 7.96. Found (%): C, 50.87; H, 5.69; N, 7.53. IR (KBr, cm<sup>-1</sup>): 3436.84 (w), 2937.61 (w), 2878.46 (w), 1673.49 (s), 1594.76 (s), 1562.83 (w), 1403.45 (s), 1384.79 (s), 1313.89 (m), 1267.24 (m), 1174.51 (m), 783.46 (m).

## S3. Single-crystal X-ray diffraction

Single-crystal X-ray diffraction data for MOF 1 in this work were recorded by using a Bruker Apex CCD diffractometer with graphite-monochromated Mo-K $\alpha$  radiation ( $\lambda = 0.71069$  Å) at 293 K. All non-hydrogen atoms were refined with anisotropic displacement parameters and hydrogen positions were fixed at calculated positions and refined isotropically. Absorption corrections were applied using multi-scan technique. All the structures were solved by Direct Method and refined by full-matrix least-squares techniques using the SHELXL-2018 program<sup>1</sup> within WINGX software. All the solvent molecules which are highly disordered and not able to be modeled were treated by the SQUEEZE<sup>2</sup> routine in PLATON<sup>3</sup>. Thus, all of electron densities from free solvent molecules have been “squeezed” out.

The detailed crystallographic data and structure refinement parameters for 1 summarized in Table S1. CCDC for 1: 2044116.

**Table S1.** Crystal data and structure refinements for MOF **1**.

| Identification code                                                     | <b>1</b>                                                                         |
|-------------------------------------------------------------------------|----------------------------------------------------------------------------------|
| formula                                                                 | C <sub>74</sub> H <sub>100</sub> N <sub>10</sub> O <sub>23</sub> Zn <sub>4</sub> |
| Formula weight                                                          | 1759.15                                                                          |
| Crystal system                                                          | Monoclinic                                                                       |
| Space group                                                             | <i>P</i> 2 <sub>1</sub> / <i>c</i>                                               |
| <i>a</i> (Å)                                                            | 24.677 (5)                                                                       |
| <i>b</i> (Å)                                                            | 21.780 (5)                                                                       |
| <i>c</i> (Å)                                                            | 25.025 (5)                                                                       |
| <i>α</i> (°)                                                            | 90.00                                                                            |
| <i>β</i> (°)                                                            | 109.500 (5)                                                                      |
| <i>γ</i> (°)                                                            | 90.00                                                                            |
| <i>V</i> (Å <sup>3</sup> )                                              | 12679 (5)                                                                        |
| <i>Z</i>                                                                | 4                                                                                |
| <i>D</i> <sub>calcd.</sub> [g cm <sup>-3</sup> ]                        | 0.554                                                                            |
| <i>F</i> (000)                                                          | 2120.0                                                                           |
| Reflections collected                                                   | 72906 / 22317                                                                    |
| <i>R</i> (int)                                                          | 0.0980                                                                           |
| Goodness-of-fit on <i>F</i> <sup>2</sup>                                | 0.718                                                                            |
| <i>R</i> <sub>1</sub> <sup><i>a</i></sup> [ <i>I</i> > 2σ ( <i>I</i> )] | 0.0578                                                                           |
| <i>wR</i> <sub>2</sub> <sup><i>b</i></sup>                              | 0.1774                                                                           |

$${}^a R_1 = \frac{\sum ||F_o| - |F_c||}{\sum |F_o|}, {}^b wR_2 = \frac{|\sum w(|F_o|^2 - |F_c|^2)|}{\sum |w(F_o^2)|}^{1/2}.$$

#### S4. MOF **1** sensing small solvent molecules

The solvent sensing experiments have been performed as follows: finely ground samples of **1** (5 mg) were immersed in different solvents (3 mL), treated by ultrasonication, and then aged to form stable emulsions before fluorescence were measured.

The fluorescence quenching was analyzed using the Stern-Volmer equations:

$$I_0/I = 1 + K_{sv} [Q]$$

where *I*<sub>0</sub> and *I* are the fluorescence intensities, in the absence and presence of analyte, respectively, *K*<sub>sv</sub> is the Stern-Volmer quenching constant and [Q] is the concentration of analyte.

The limit of detection concentration (LOD) was calculated according to the formula:

$$\text{LOD} = 3\delta / K_{sv}$$

δ is the standard deviation of the detection method.

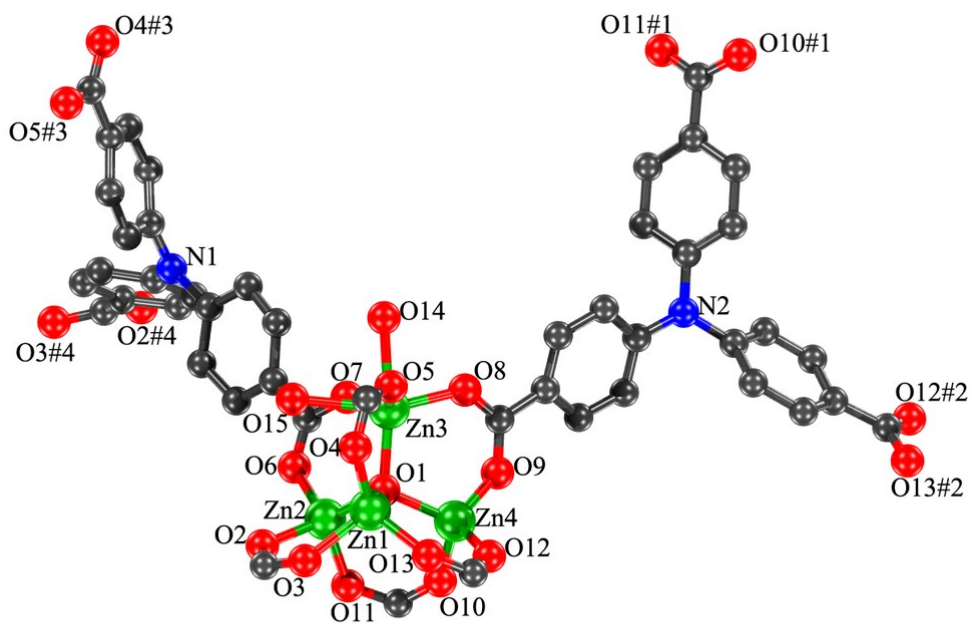

**Fig. S1** The coordination modes of  $\text{Zn}^{2+}$  ions in **1**, symmetry codes: #1  $x, -0.5-y, 0.5+z$ ; #2  $-x, -0.5+y, 0.5-z$ ; #3  $1-x, -y, 1-z$ ; #4  $1-x, -0.5+y, 0.5-z$ . All hydrogen atoms have been omitted for clarity. Green = Zn; dark gray = C; red = O; blue = N.

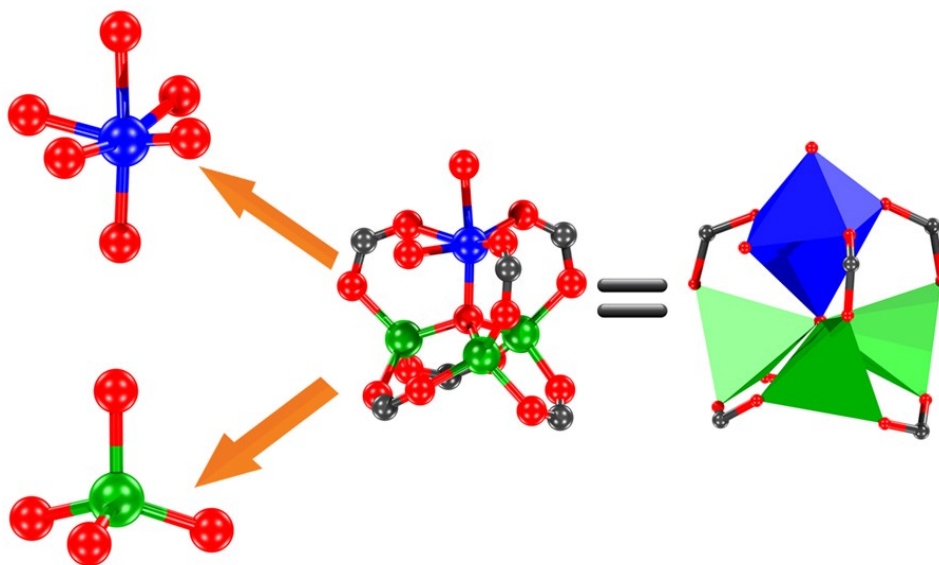

**Fig. S2** The  $\text{Zn}_4\text{O}$  cluster SBU in **1**.

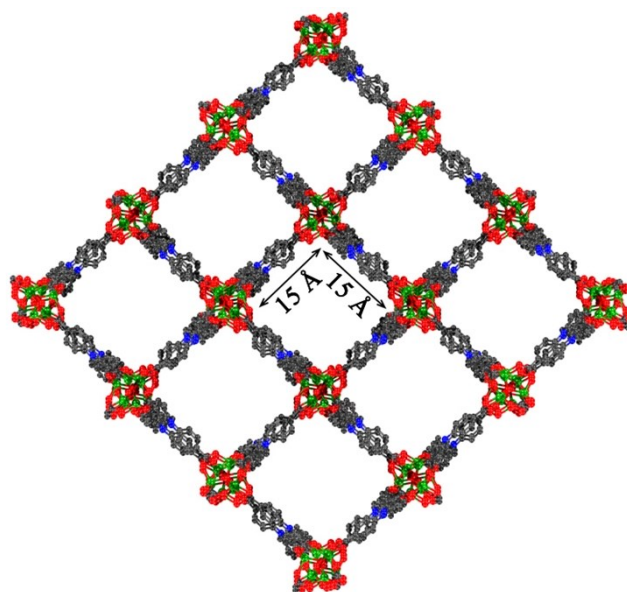

**Fig. S3** Ball-and-stick representation of the 3D network of **1** viewed from the [101] direction and the channel ( $15 \text{ \AA} \times 15 \text{ \AA}$ ).

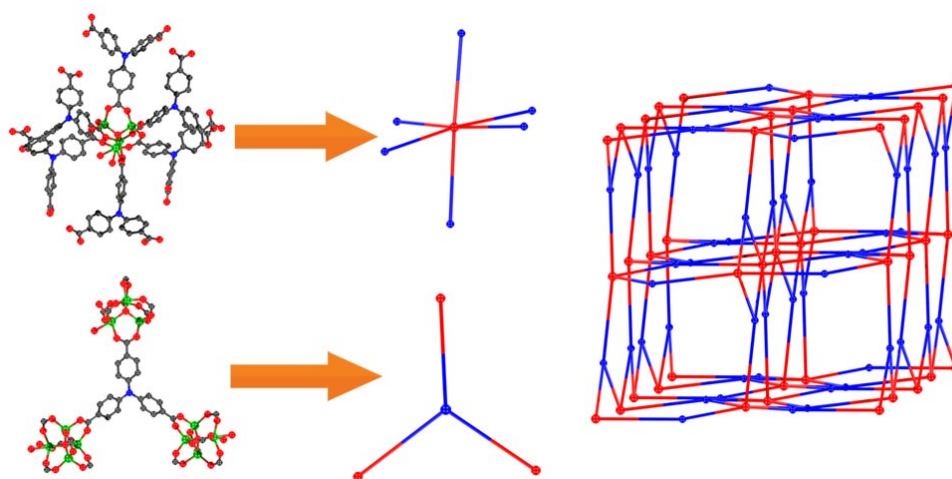

**Fig. S4** The (3, 6)-connected topology network in **1**.

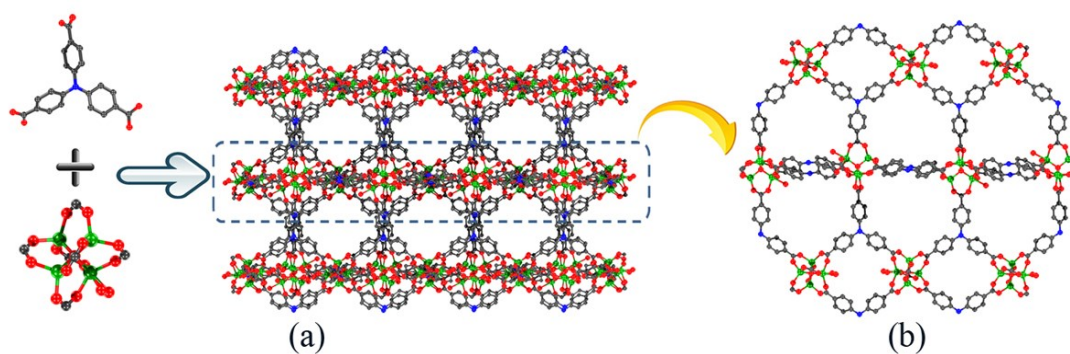

**Fig. S5** (a) Ball-and-stick representations of the 3D structure of **1**. (b) The layer is formed by  $\text{Zn}_4\text{O}$  clusters and  $\text{TPA}^{3-}$  ligands.

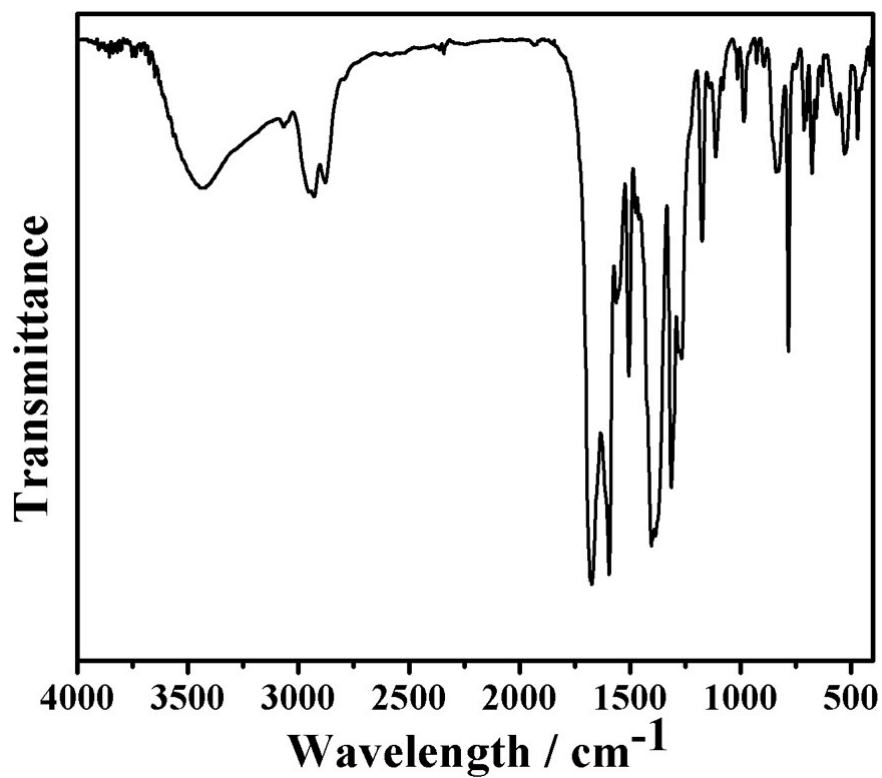

Fig. S6 The FT-IR curve of as-synthesized complex **1** at room temperature.

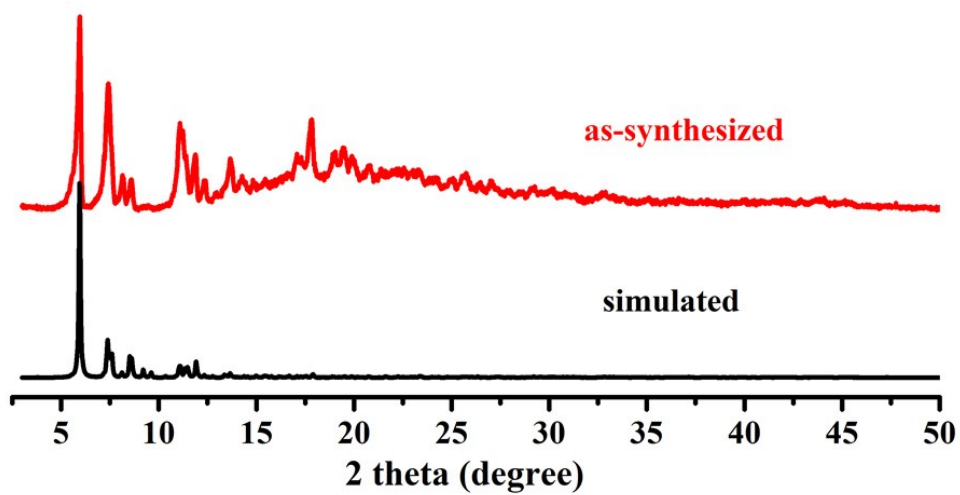

Fig. S7 X-ray powder diffraction patterns of simulated **1** and as-synthesized **1**.

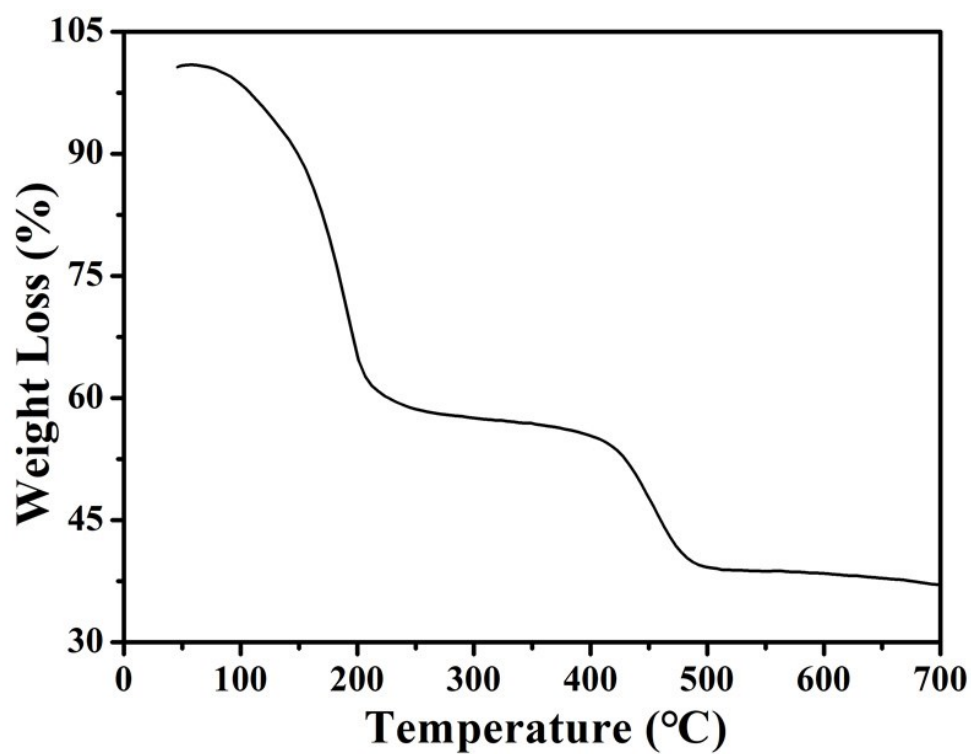

Fig. S8 TGA curve of as-synthesized MOF 1.

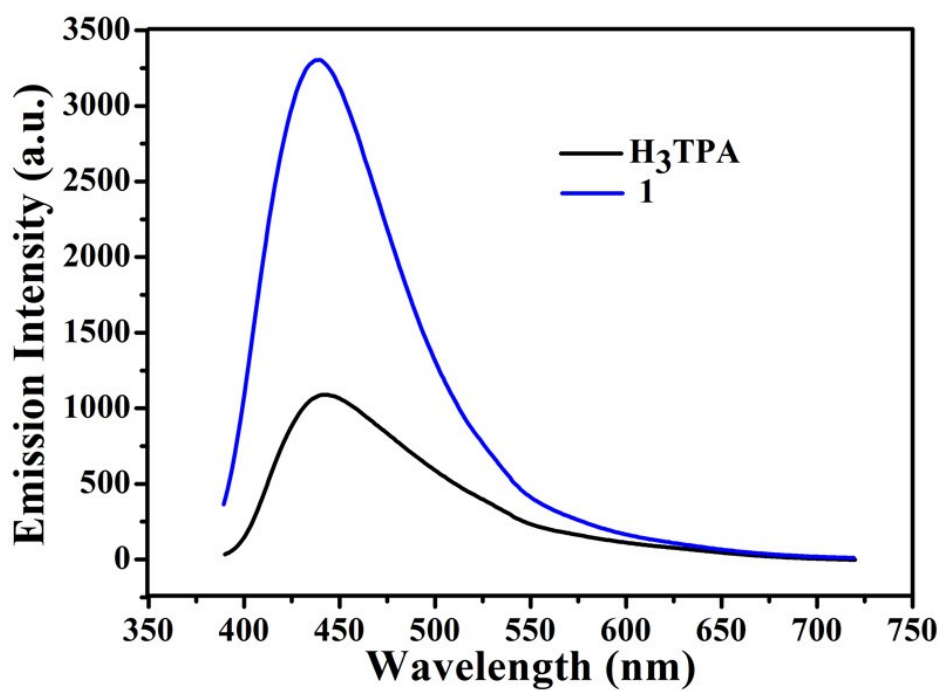

Fig. S9 Solid photoluminescence emission spectra of H<sub>3</sub>TPA ligand and complex 1 ( $\lambda_{ex} = 365$  nm) at room temperature.

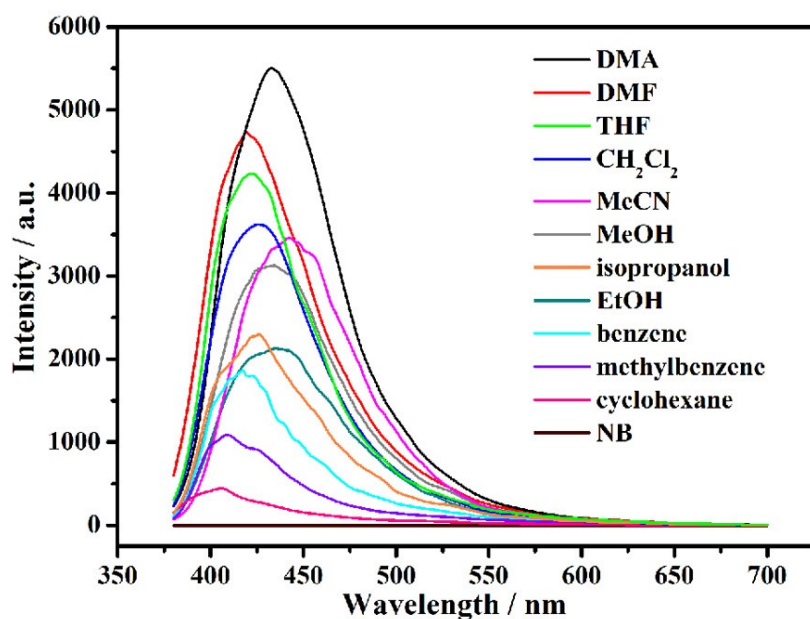

**Fig. S10** The photoluminescence emission spectra of **1** in different solvents ( $\lambda_{\text{ex}} = 365 \text{ nm}$ ) at room temperature (solvents = DMF, DMA, MeOH, EtOH, isopropanol,  $\text{CH}_2\text{Cl}_2$ , MeCN, THF, benzene, methylbenzene, cyclohexane and NB).

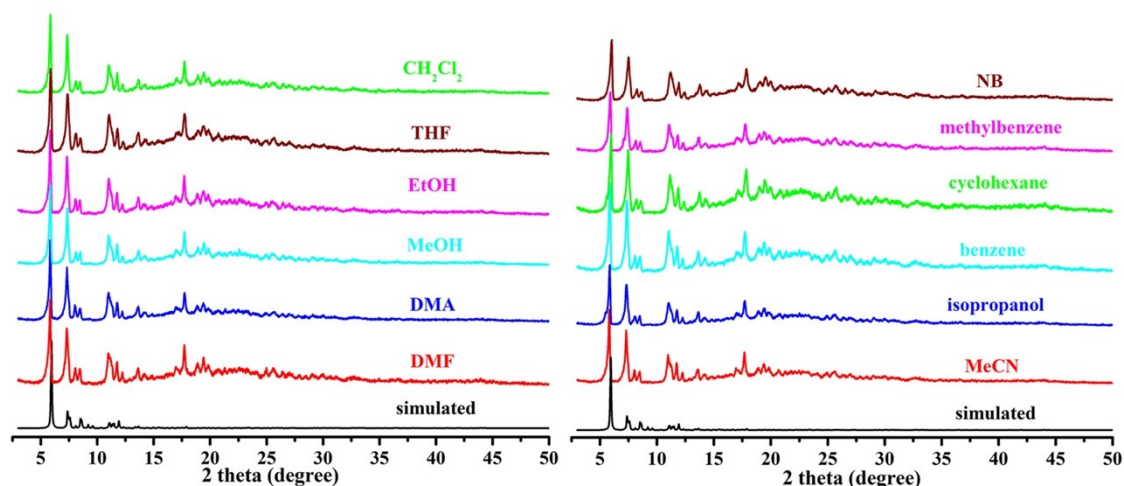

**Fig. S11** The PXRDs of MOF **1** after solvents (solvents = DMF, DMA, MeOH, EtOH, THF,  $\text{CH}_2\text{Cl}_2$ , MeCN, isopropanol, benzene, cyclohexane, methylbenzene and NB) sensing.

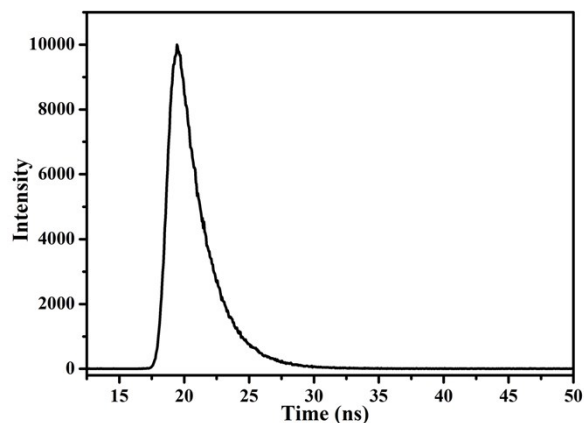

**Fig. S12** The fluorescence decay of complex **1** in DMA emulsion.



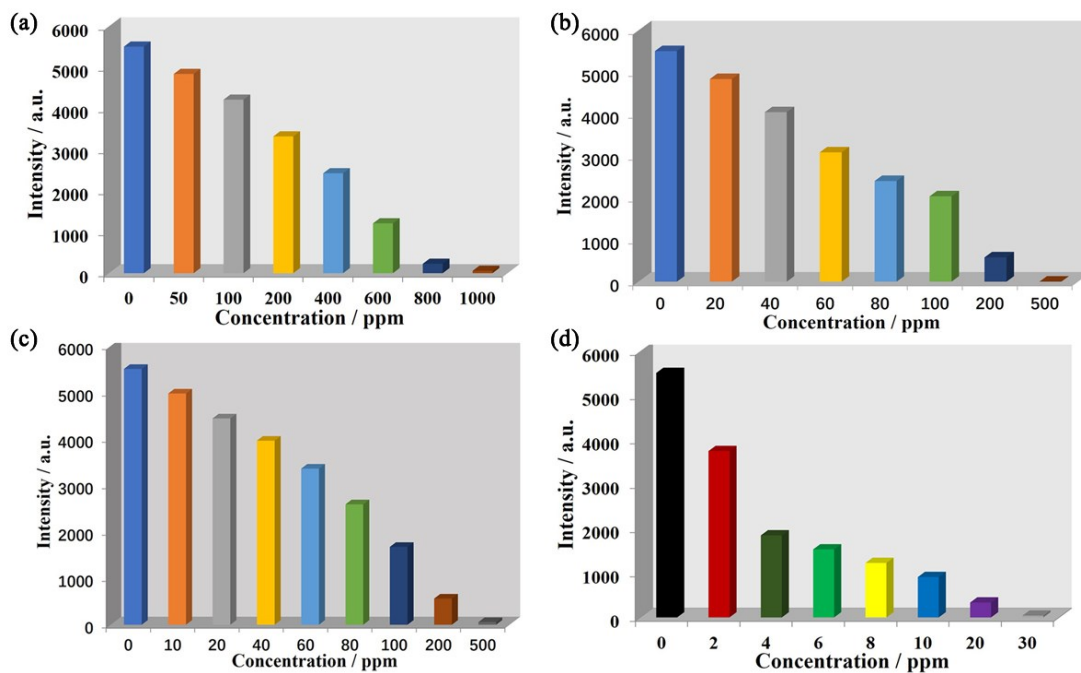

**Fig. S13** The luminescent emission intensities of sample 1 in different concentrations of nitroaromatic explosives solutions (a) NB, (b) 1,2-DNB, (c) 1,3-DNB, and (d) PA respectively.

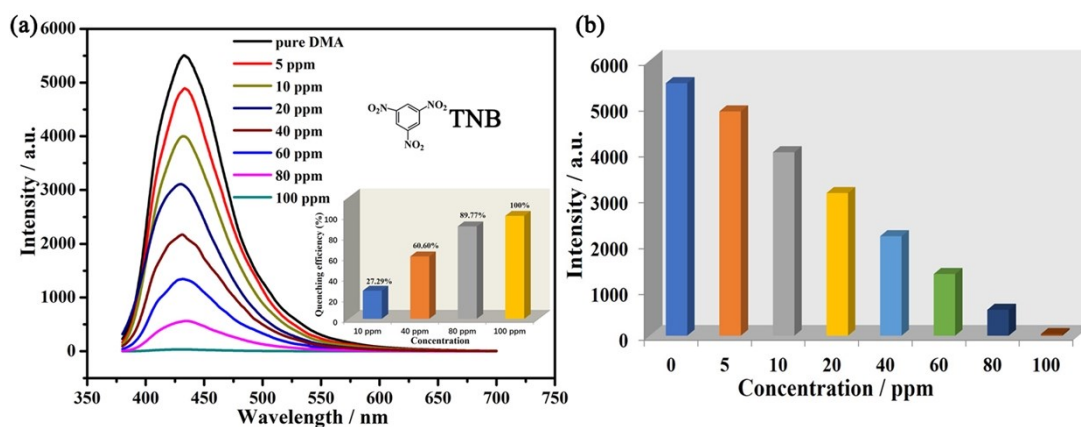

**Fig. S14** (a) The fluorescence emission spectra of 1 in DMA solutions containing different concentrations of TNB, Inset: Corresponding luminescence quenching efficiency in selected concentrations of TNB, (b) The corresponding luminescent emission intensities of sample 1 in TNB solutions.

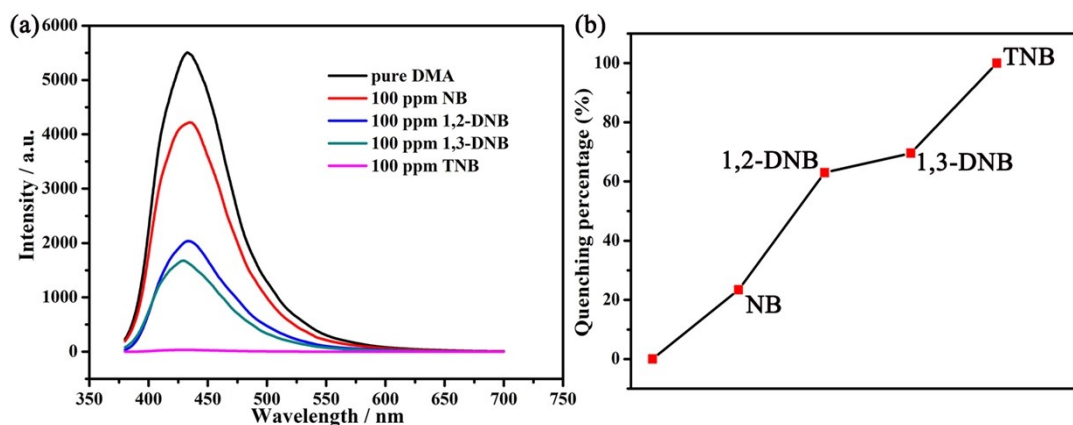

**Fig. S15** (a) The luminescent emission spectra and (b) quenching efficiency of **1** in DMA solutions containing nitroaromatic explosives compounds (100 ppm). The quenching efficiency, defined by  $(I_0 - I)/I_0 \times 100\%$ , where  $I_0$  and  $I$  are the luminescence intensities of **1** before and after the addition of the analyte, respectively.

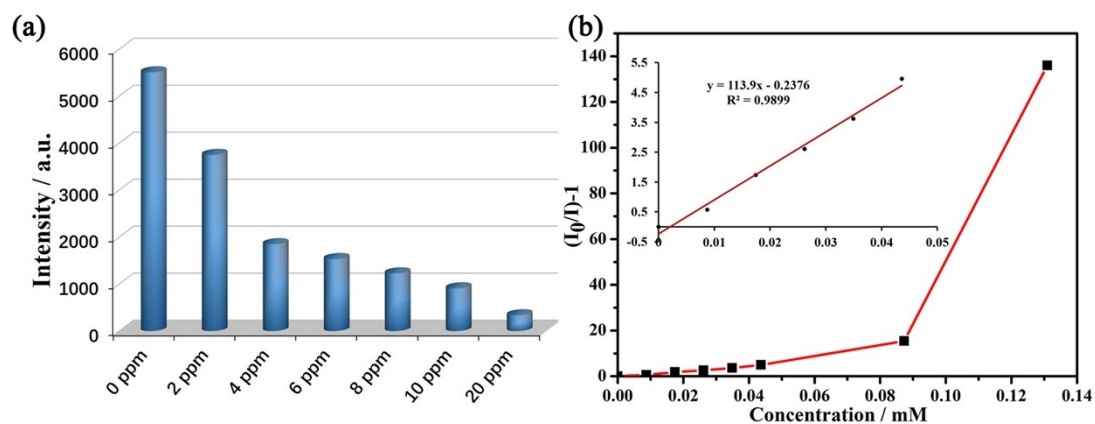

**Fig. S16** (a) The emission intensities of **1** in DMA containing different amounts of PA and (b) corresponding Stern-Volmer plots of PA.

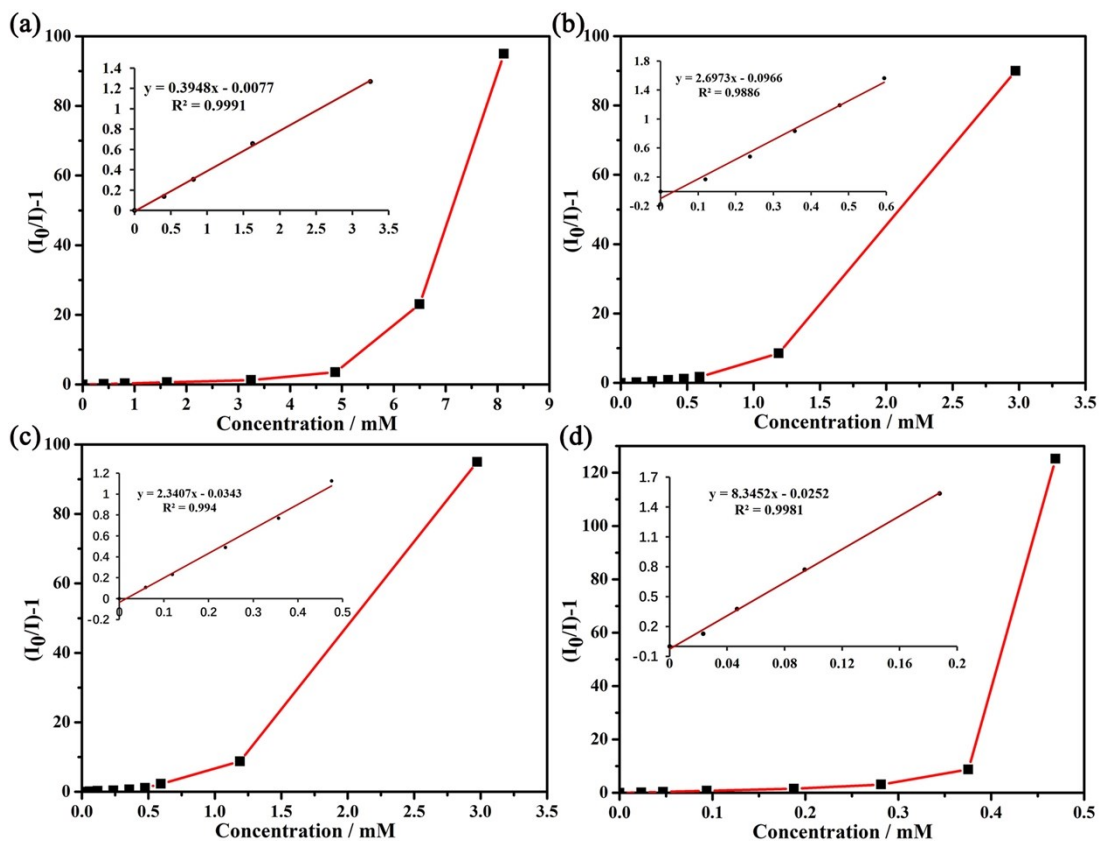

**Fig. S17** The Stern-Volmer plots for (a) NB, (b) 1,2-DNB, (c) 1,3-DNB and (d) TNB (insert: the corresponding enlarged views of selected areas).

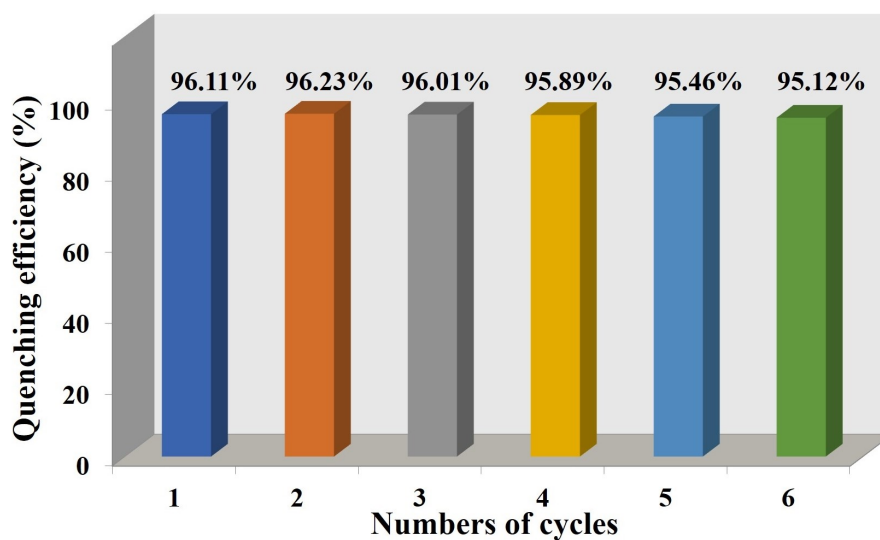

**Fig. S18** Bar diagram depicting the recyclable quenching efficiency of 1 dispersed in 800 ppm NB solution over 6 cycles.

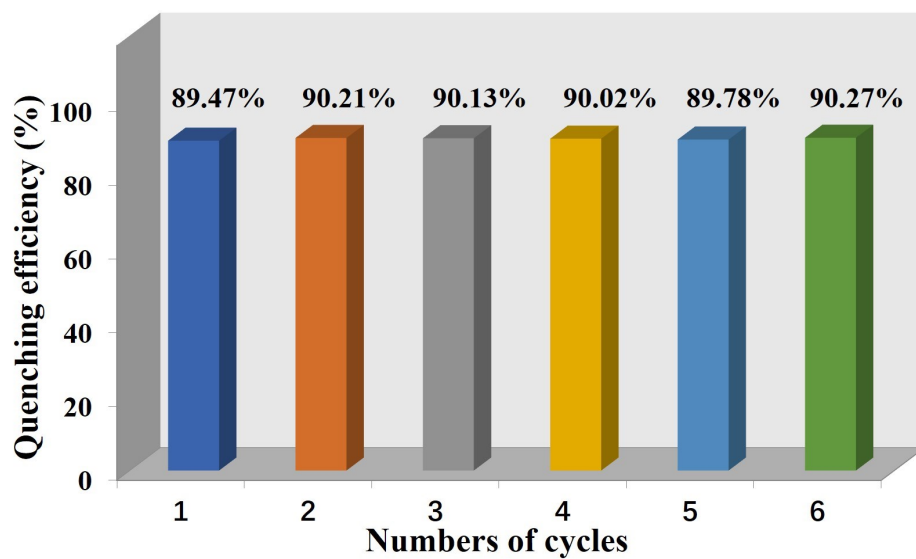

**Fig. S19** Bar diagram depicting the recyclable quenching efficiency of **1** dispersed in 200 ppm 1,2-DNB solution over 6 cycles.

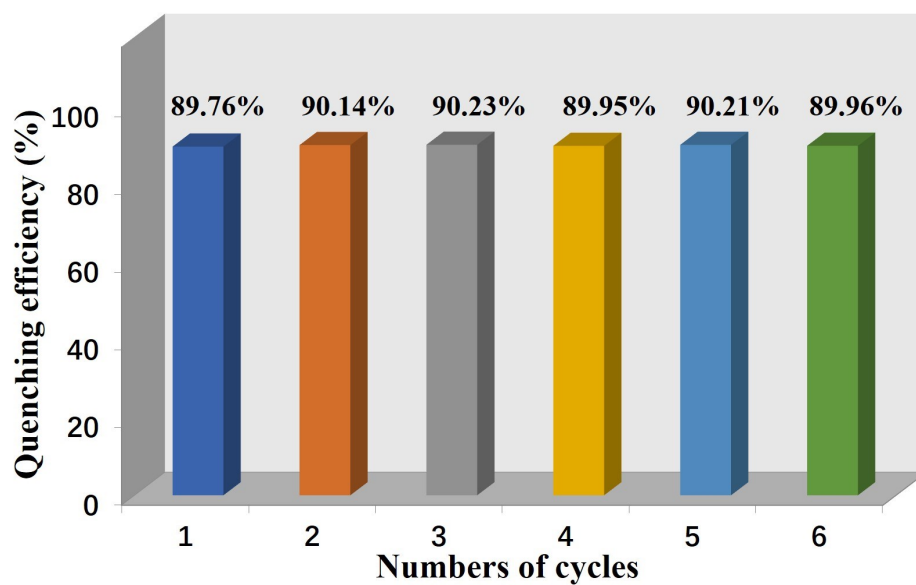

**Fig. S20** Bar diagram depicting the recyclable quenching efficiency of **1** dispersed in 200 ppm 1,3-DNB solution over 6 cycles.

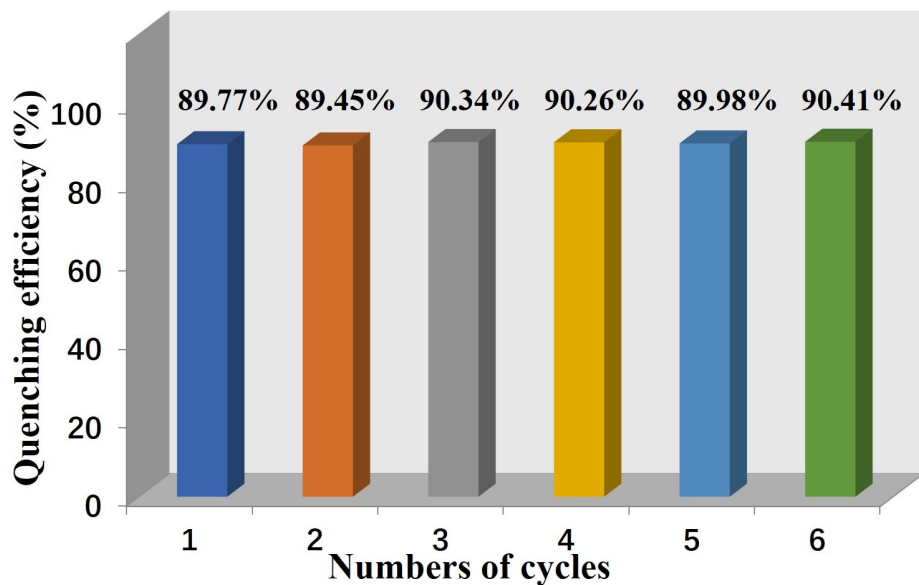

**Fig. S21** Bar diagram depicting the recyclable quenching efficiency of **1** dispersed in 80 ppm TNB solution over 6 cycles.

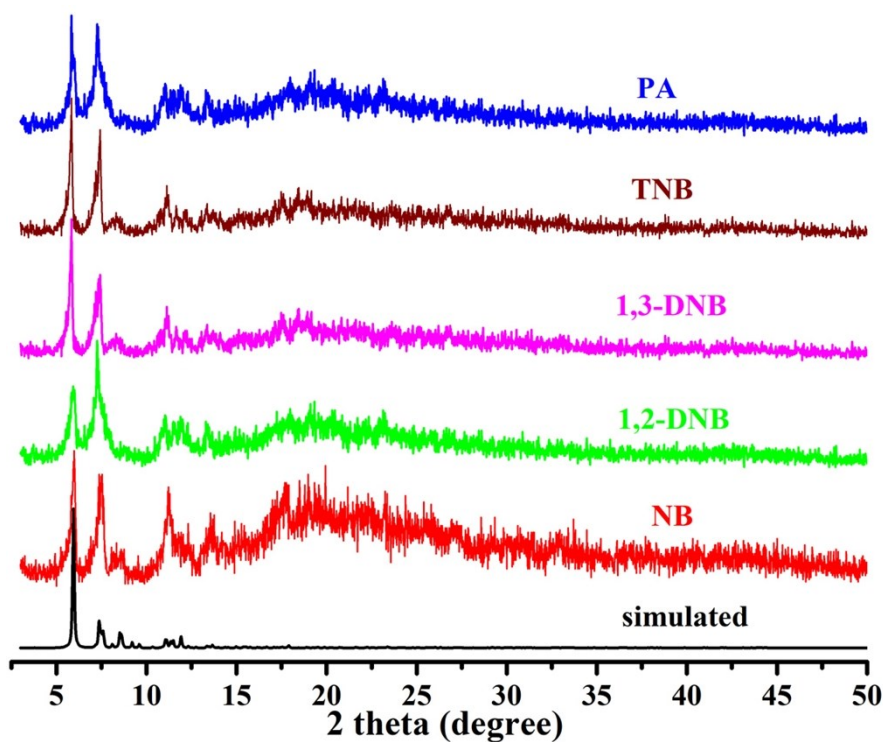

**Fig. S22** The PXRD patterns of **1** after detection of NB, 1,2-DNB, 1,3-DNB, TNB and PA in DMA after cycle 6, respectively.

### References:

- [1] D. Leggas, O. V. Tsodikov, *Acta Cryst. A* 2015, **71**, 319-324.
- [2] A. Spek, *Acta Cryst. C* 2015, **71**, 9-18.
- [3] A. Spek, *Acta Cryst. D* 2009, **65**, 148-155.
